# Supplementary material
Source: PubMed Central journal article supplement (PMC2025619)
Supplement: cmaj_177_9_1033_v2_1.pdf [file cmaj_177_9_1033_v2_1.pdf]

**Appendix 1: Diagnoses of primary renal disease among elderly patients who began dialysis between 1990 and 1999 as reported in the Canadian Organ Replacement Register, with Canadian Organ Replacement Register classification and disease category used in the study**

| Diagnosis                                                                             | Canadian Organ Replacement Register classification | Category used in study        |
|---------------------------------------------------------------------------------------|----------------------------------------------------|-------------------------------|
| Not reported (to date)                                                                | –                                                  | Unknown                       |
| Prune-belly syndrome                                                                  | Congenital/hereditary                              | Other                         |
| Congenital renal dysplasia or hypoplasia                                              | Congenital/hereditary                              | Other                         |
| Cystic kidney disease                                                                 | Congenital/hereditary                              | Other                         |
| Cystinosis                                                                            | Congenital/hereditary                              | Other                         |
| Denys-Drash syndrome                                                                  | Congenital/hereditary                              | Other                         |
| Fabry's disease                                                                       | Congenital/hereditary                              | Other                         |
| Hereditary nephritis                                                                  | Congenital/hereditary                              | Other                         |
| Medullary cystic disease – including nephronophthisis                                 | Congenital/hereditary                              | Other                         |
| Oligomeganephronic hypoplasia                                                         | Congenital/hereditary                              | Other                         |
| Posterior urethral valves                                                             | Congenital/hereditary                              | Other                         |
| Primary oxalosis                                                                      | Congenital/hereditary                              | Other                         |
| Segmental renal hypoplasia – Ask-Upmark kidney                                        | Congenital/hereditary                              | Other                         |
| Diabetes – type 1 (juvenile)                                                          | Diabetes                                           | Diabetes                      |
| Diabetes – type 2 (adult onset)                                                       | Diabetes                                           | Diabetes                      |
| Focal glomerulonephritis – unknown, idiopathic                                        | Glomerulonephritis/autoimmune                      | Glomerulonephritis/autoimmune |
| Focal glomerulonephritis – adult                                                      | Glomerulonephritis/autoimmune                      | Glomerulonephritis/autoimmune |
| Glomerulonephritis – congenital nephrosis or nephrotic syndrome                       | Glomerulonephritis/autoimmune                      | Glomerulonephritis/autoimmune |
| Glomerulonephritis – dense deposit disease (proven)                                   | Glomerulonephritis/autoimmune                      | Glomerulonephritis/autoimmune |
| Glomerulonephritis – histologically <i>not</i> examined                               | Glomerulonephritis/autoimmune                      | Glomerulonephritis/autoimmune |
| Glomerulonephritis – idiopathic crescented glomerulonephritis (diffuse proliferative) | Glomerulonephritis/autoimmune                      | Glomerulonephritis/autoimmune |
| Glomerulonephritis – IgA nephropathy                                                  | Glomerulonephritis/autoimmune                      | Glomerulonephritis/autoimmune |
| Glomerulonephritis – membranoproliferative mesangiocapillary glomerulonephritis       | Glomerulonephritis/autoimmune                      | Glomerulonephritis/autoimmune |
| Glomerulonephritis – membranous nephropathy                                           | Glomerulonephritis/autoimmune                      | Glomerulonephritis/autoimmune |
| Glomerulonephritis – severe nephrotic syndrome – focal sclerosis                      | Glomerulonephritis/autoimmune                      | Glomerulonephritis/autoimmune |
| Goodpasture's syndrome                                                                | Glomerulonephritis/autoimmune                      | Glomerulonephritis/autoimmune |
| Hemolytic uremic syndrome (Moschcowitz)                                               | Glomerulonephritis/autoimmune                      | Glomerulonephritis/autoimmune |
| Schönlein-Henoch purpura                                                              | Glomerulonephritis/autoimmune                      | Glomerulonephritis/autoimmune |
| Lupus erythematosus                                                                   | Glomerulonephritis/autoimmune                      | Glomerulonephritis/autoimmune |
| Mesangial proliferative glomerulonephritis                                            | Glomerulonephritis/autoimmune                      | Glomerulonephritis/autoimmune |
| Minimal lesion glomerulonephritis                                                     | Glomerulonephritis/autoimmune                      | Glomerulonephritis/autoimmune |
| Post-strep glomerulonephritis                                                         | Glomerulonephritis/autoimmune                      | Glomerulonephritis/autoimmune |
| Rapidly progressive glomerulonephritis                                                | Glomerulonephritis/autoimmune                      | Glomerulonephritis/autoimmune |
| Scleroderma                                                                           | Glomerulonephritis/autoimmune                      | Glomerulonephritis/autoimmune |
| Wegener's granulomatosis                                                              | Glomerulonephritis/autoimmune                      | Glomerulonephritis/autoimmune |
| Nephropathy – drug induced                                                            | Nephropathy - Drug Induced                         | Other                         |
| Amyloid                                                                               | Other diagnoses                                    | Other                         |
| Balkan nephropathy                                                                    | Other diagnoses                                    | Other                         |
| Cortical or tubular necrosis                                                          | Other diagnoses                                    | Other                         |

continued

Appendix 1 continued

| Diagnosis                                      | Canadian Organ Replacement Register classification | Category used in study   |
|------------------------------------------------|----------------------------------------------------|--------------------------|
| Gout                                           | Other diagnoses                                    | Other                    |
| HIV nephropathy                                | Other diagnoses                                    | Other                    |
| Kidney tumour                                  | Other diagnoses                                    | Other                    |
| Multi-system disease – other                   | Other diagnoses                                    | Other                    |
| Myelomatosis                                   | Other diagnoses                                    | Other                    |
| Nephrocalcinosis and hypercalcemic nephropathy | Other diagnoses                                    | Other                    |
| Other                                          | Other diagnoses                                    | Other                    |
| Sickle cell syndrome                           | Other diagnoses                                    | Other                    |
| Traumatic or surgical loss of kidney           | Other diagnoses                                    | Other                    |
| Tuberculosis                                   | Other diagnoses                                    | Other                    |
| Wilms' tumour                                  | Other diagnoses                                    | Other                    |
| Polycystic kidneys                             | Polycystic kidney disease                          | Other                    |
| Pyelo/interstitial nephritis                   | Pyelo/interstitial nephritis                       | Other                    |
| Atheroembolic renal disease                    | Renal vascular                                     | Hypertensive or ischemic |
| Renal vascular disease                         | Renal vascular                                     | Hypertensive or ischemic |
| Chronic renal failure – cause uncertain        | Unknown                                            | Unknown                  |
