# Supplementary material
Source: PubMed Central journal article supplement (PMC2025619)
Supplement: cmaj_177_9_1033_v2_2.pdf [file cmaj_177_9_1033_v2_2.pdf]

**Appendix 2: Definitions used to determine presence of comorbidities among elderly patients initiating dialysis**

| Comorbidity                           | Definition                                                                                                                                                                                                              |
|---------------------------------------|-------------------------------------------------------------------------------------------------------------------------------------------------------------------------------------------------------------------------|
| Myocardial infarction                 | Patient has confirmed myocardial infarction on the basis of electrocardiogram, cardiac enzyme levels, echocardiogram, or thallium scans before beginning renal replacement therapy                                      |
| Previous coronary artery bypass graft | Patient has had coronary artery bypass graft surgery before beginning renal replacement therapy                                                                                                                         |
| Diabetes                              | Patient has received diagnosis of diabetes mellitus before beginning renal replacement therapy                                                                                                                          |
| Cerebrovascular disease               | Patient has had a cerebrovascular event (e.g., transient cerebral ischemic attack, cerebral infarct, cerebral hemorrhage, stroke, cerebrovascular accident) before beginning renal replacement therapy                  |
| Peripheral vascular disease           | Patient has been described as having intermittent claudication at rest or during exercise, or has had aortofemoral bypass surgery, or amputation (e.g., of toes, lower legs) before beginning renal replacement therapy |
| Vascular disease                      | Patient has received diagnosis of either cerebrovascular disease or peripheral vascular disease, or both, as defined above                                                                                              |
| Neoplasia                             | Patient has received a diagnosis of a malignant disease before beginning renal replacement therapy. The site of the primary malignant disease is coded separately. All malignant diseases were considered equal         |
